# Supplementary material for: Evaluating lubricant performance to reduce COVID-19 PPE-related skin injury
Source: PubMed Central journal article supplement (PMC7514078; doi:10.1371/journal.pone.0239363), 2020-09-24
Supplement: pone.0239363.s001.pdf [file pone.0239363.s001.pdf]

19 May 2020

Dear Dr Marc Masen

**Study Title:** Skin friction measurements to assess efficacy of lubricants

**SETREC reference:** 20IC5999

The above study was approved by your Head of Department on 12/05/20 and by the Joint Research Compliance Office on 19/05/20.

Under the Science Engineering Technology Research Ethics Committee process, a study that has been reviewed by the Joint Research Compliance Office and Head of Division/Department, where no significant ethical issues have been identified in the protocol or ethics application, can be given JRCO approval without requiring it to go to full committee.

#### **Documents**

The documents reviewed were:

- Application form (v3.0 19/05/2020)
- Protocol (v3.0 19/05/2020)
- Consent Form (v2.0 18/05/2020)

Yours sincerely,

Ruth Nicholson,  
Head of Research Governance and Integrity,  
Imperial College London
